# Supplementary material
Source: publisher figshare collection journal article supplement (https://gsajournals.figshare.com/ndownloader/files/26610284)
Supplement: Supplementary file 1 [file 26610284]

## Sheet: Legend
Dataset S5 (separate file). Enzymes from GSEA Enriched KEGG Pathways (.xlsx workbook). Each row represents an enzyme within each KEGG pathway and for each lifestage comparison if the pathway is enriched or depleted. Columns represent LOC numbers (Probe), GSEA metrics (Rank in Gene List, Rank Metric Score, Running ES), and if the enzyme is enriched or not (Core Enrichment). Each Tab represents an …

## Sheet: API00010
API00010	Glycolysis / Gluconeogenesis
1stvRest
NAME	PROBE	RANK IN GENE LIST	RANK METRIC SCORE	RUNNING ES	CORE ENRICHMENT
row_0	100163785	420	2.01704	0.0309179	Yes
row_1	115033876	674	1.78202	0.0667465	Yes
row_2	100168448	747	1.74173	0.114404	Yes
row_3	100160659	1452	1.3554	0.104767	Yes
row_4	100161161	1623	1.28078	0.131371	Yes
row_5	100169524	1693	1.25825	0.164575	Yes
row_6	100160041	1935	1.16216	0.182461	Yes
row_7	100159357	1967	1.14909	0.215092	Yes
row_8	100162318	1986	1.14413	0.248511	Yes
row_9	100161065	1988	1.14309	0.283124	Yes
row_10	100167278	2078	1.11615	0.310574	Yes
row_11	100164251	2565	0.968061	0.304903	Yes
row_12	100167586	2590	0.962109	0.332366	Yes
row_13	100169122	2880	0.890168	0.338537	Yes
row_14	100166128	2951	0.871461	0.359932	Yes
row_15	100165804	3037	0.849817	0.379589	Yes
row_16	100160293	3063	0.844871	0.403422	Yes
row_17	100159019	3199	0.813651	0.418376	Yes
row_18	100169093	3285	0.789666	0.436208	Yes
row_19	100161533	3288	0.789105	0.460008	Yes
row_20	100167954	3438	0.752937	0.47211	Yes
row_21	100167046	3469	0.744465	0.492536	Yes
row_22	100145826	3494	0.736686	0.513159	Yes
row_23	100162429	3576	0.717145	0.529079	Yes
row_24	100164819	3963	0.62194	0.520116	Yes
row_25	100168209	4212	0.576217	0.519718	Yes
row_26	100162800	4287	0.560103	0.531377	Yes
row_27	100162303	4506	0.517538	0.531361	No
row_28	100159252	6232	0.17703	0.412345	No
row_29	103310688	6359	0.152332	0.407882	No
row_30	100570401	6407	0.14404	0.408864	No
row_31	100160700	6413	0.143264	0.41285	No
row_32	100161397	6705	0.0880377	0.394538	No
row_33	100161475	7034	0.0265393	0.371692	No
row_34	100162578	7102	0.0134893	0.36727	No
row_35	100164837	7785	-0.109105	0.321402	No
row_36	100165955	8742	-0.280244	0.26097	No
row_37	100162014	9056	-0.330161	0.248418	No
row_38	100163975	9302	-0.375508	0.242146	No
row_39	103309947	9520	-0.408916	0.238906	No
row_40	100158700	9624	-0.426229	0.244412	No
row_41	100167959	10856	-0.647556	0.175295	No
row_42	100572734	10970	-0.671435	0.187521	No
row_43	100164885	11640	-0.806715	0.163758	No
2ndvRest
NAME	PROBE	RANK IN GENE LIST	RANK METRIC SCORE	RUNNING ES	CORE ENRICHMENT
row_0	100160293	354	0.821188	0.0208523	Yes
row_1	100169093	380	0.808288	0.0646997	Yes
row_2	100159019	617	0.721834	0.0884495	Yes
row_3	100145826	730	0.686073	0.119121	Yes
row_4	100164819	1097	0.597539	0.126477	Yes
row_5	100167046	1185	0.581212	0.153029	Yes
row_6	100160041	1347	0.550897	0.172533	Yes
row_7	100162318	1528	0.523476	0.189118	Yes
row_8	100164251	1534	0.523223	0.218308	Yes
row_9	100167278	1587	0.513317	0.243549	Yes
row_10	100167586	1667	0.501078	0.266152	Yes
row_11	100165804	1695	0.496231	0.292231	Yes
row_12	100169122	1770	0.485731	0.314328	Yes
row_13	100162800	1801	0.481933	0.339383	Yes
row_14	100159252	1922	0.463474	0.356906	Yes
row_15	100161065	2010	0.452283	0.376176	Yes
row_16	100169524	2051	0.447177	0.398547	Yes
row_17	100162429	2352	0.40399	0.399731	Yes
row_18	100160659	2437	0.391941	0.41581	Yes
row_19	100161161	2459	0.389817	0.436312	Yes
row_20	100168209	2604	0.371092	0.446886	Yes
row_21	100161533	2662	0.364772	0.463378	Yes
row_22	100168448	2896	0.336816	0.465599	Yes
row_23	100164837	3195	0.301673	0.461148	Yes
row_24	115033876	3561	0.262142	0.449634	Yes
row_25	100572734	3628	0.255753	0.459319	Yes
row_26	100164885	3685	0.249521	0.469373	Yes
row_27	100163785	3710	0.247776	0.481637	Yes
row_28	100166128	4058	0.213191	0.468655	No
row_29	100158700	4467	0.177799	0.449277	No
row_30	100162578	4597	0.167049	0.449409	No
row_31	100159357	5135	0.119969	0.417463	No
row_32	100165955	5972	0.0468193	0.359824	No
row_33	100167954	6106	0.0355221	0.35224	No
row_34	100160700	6840	-0.0297213	0.301063	No
row_35	100162303	7329	-0.0694056	0.269794	No
row_36	100163975	7383	-0.0738554	0.270143	No
row_37	100570401	8879	-0.200478	0.173664	No
row_38	100161475	9004	-0.21394	0.176805	No
row_39	100161397	11224	-0.431851	0.0411864	No
row_40	100167959	12005	-0.528805	0.0148074	No
row_41	103310688	12611	-0.628046	0.0066523	No
row_42	100162014	12925	-0.703212	0.023798	No
row_43	103309947	13371	-0.836239	0.0389385	No
3rdvRest
NS
4thvRest
NAME	PROBE	RANK IN GENE LIST	RANK METRIC SCORE	RUNNING ES	CORE ENRICHMENT
row_0	100167959	380	1.16195	0.0127352	No
row_1	100164885	1276	0.882849	-0.0213064	No
row_2	100572734	1492	0.835139	-0.00796223	No
row_3	100163975	4408	0.288799	-0.208183	No
row_4	100162014	4888	0.20542	-0.235627	No
row_5	103309947	4923	0.198341	-0.231228	No
row_6	100162303	5385	0.117713	-0.260403	No
row_7	100164837	5899	0.0264136	-0.296483	No
row_8	100158700	6061	-0.00142718	-0.308043	No
row_9	103310688	6397	-0.0629299	-0.330025	No
row_10	100168209	6715	-0.114623	-0.348925	No
row_11	100162429	6938	-0.155251	-0.35957	No
row_12	100162800	7226	-0.20528	-0.373174	No
row_13	100145826	7457	-0.248837	-0.381164	No
row_14	100161397	7692	-0.283113	-0.388258	No
row_15	100164251	8178	-0.365135	-0.410618	No
row_16	100167586	8322	-0.385991	-0.407596	No
row_17	100159252	8610	-0.434467	-0.413284	No
row_18	100165804	8718	-0.450957	-0.405423	No
row_19	100161475	8895	-0.480489	-0.401517	No
row_20	100570401	8987	-0.492422	-0.391069	No
row_21	100165955	9397	-0.559872	-0.401222	No
row_22	100159019	10054	-0.665657	-0.425532	No
row_23	100167278	10480	-0.725882	-0.431105	Yes
row_24	100164819	10565	-0.736249	-0.41173	Yes
row_25	100166128	10782	-0.764082	-0.400913	Yes
row_26	100163785	10940	-0.784341	-0.385141	Yes
row_27	100169093	11127	-0.8088	-0.370616	Yes
row_28	100161533	11146	-0.811218	-0.343892	Yes
row_29	100161065	11233	-0.821139	-0.32173	Yes
row_30	100168448	11322	-0.83174	-0.299345	Yes
row_31	100169122	11399	-0.843197	-0.2757	Yes
row_32	115033876	11535	-0.868379	-0.255439	Yes
row_33	100160041	11711	-0.895311	-0.237132	Yes
row_34	100167954	11726	-0.89675	-0.207166	Yes
row_35	100160700	11974	-0.946057	-0.192297	Yes
row_36	100162578	12111	-0.973388	-0.168481	Yes
row_37	100167046	12779	-1.14012	-0.177196	Yes
row_38	100160659	12806	-1.14527	-0.13951	Yes
row_39	100159357	12860	-1.16245	-0.103179	Yes
row_40	100162318	13138	-1.26311	-0.0795222	Yes
row_41	100169524	13206	-1.29758	-0.0395322	Yes
row_42	100160293	13208	-1.2987	0.00525554	Yes
row_43	100161161	13237	-1.31331	0.048601	Yes
YAvRest
NAME	PROBE	RANK IN GENE LIST	RANK METRIC SCORE	RUNNING ES	CORE ENRICHMENT
row_0	100162014	306	1.18283	0.0166956	No
row_1	100162578	770	0.810066	0.00985495	No
row_2	100161397	996	0.708271	0.0168403	No
row_3	100570401	1456	0.560168	0.002099	No
row_4	100161475	1561	0.53307	0.0120682	No
row_5	100160700	1629	0.515174	0.024119	No
row_6	100165955	2151	0.412531	6.89296e-05	No
row_7	100167959	2428	0.367988	-0.00777419	No
row_8	103309947	3245	0.259315	-0.058117	No
row_9	103310688	4211	0.148541	-0.122834	No
row_10	100158700	4923	0.0792399	-0.171507	No
row_11	100166128	5689	0.00448282	-0.226523	No
row_12	100167954	6054	-0.0299194	-0.25179	No
row_13	100159357	6084	-0.0327777	-0.252807	No
row_14	100163975	6581	-0.0815421	-0.2859	No
row_15	100169524	9338	-0.343812	-0.473365	No
row_16	100162303	11103	-0.538638	-0.582913	Yes
row_17	100164819	11345	-0.566277	-0.581735	Yes
row_18	100161161	11390	-0.571201	-0.566189	Yes
row_19	100169122	11408	-0.573569	-0.548619	Yes
row_20	100160293	11544	-0.594383	-0.538876	Yes
row_21	100159019	11872	-0.636881	-0.541586	Yes
row_22	100160659	12198	-0.683196	-0.542633	Yes
row_23	100168209	12471	-0.724819	-0.538494	Yes
row_24	100161533	12596	-0.745041	-0.523021	Yes
row_25	100145826	12612	-0.747575	-0.499605	Yes
row_26	100167278	12707	-0.766875	-0.481253	Yes
row_27	100165804	12820	-0.788945	-0.463476	Yes
row_28	100168448	12831	-0.791024	-0.438275	Yes
row_29	100167046	12986	-0.827214	-0.422272	Yes
row_30	115033876	13115	-0.858118	-0.403382	Yes
row_31	100163785	13165	-0.87244	-0.378326	Yes
row_32	100164837	13240	-0.896831	-0.354273	Yes
row_33	100164885	13303	-0.913276	-0.328816	Yes
row_34	100162318	13400	-0.951295	-0.304565	Yes
row_35	100572734	13411	-0.954755	-0.273999	Yes
row_36	100160041	13475	-0.982555	-0.246344	Yes
row_37	100159252	13543	-1.01674	-0.217857	Yes
row_38	100162429	13611	-1.05489	-0.18812	Yes
row_39	100164251	13721	-1.14444	-0.158478	Yes
row_40	100167586	13810	-1.25455	-0.123712	Yes
row_41	100162800	13819	-1.28324	-0.0822375	Yes
row_42	100169093	13839	-1.32981	-0.0400303	Yes
row_43	100161065	13854	-1.3778	0.0041102	Yes

## Sheet: API00250
API00250	Alanine, aspartate and glutamate metabolism
1stvRest
NAME	PROBE	RANK IN GENE LIST	RANK METRIC SCORE	RUNNING ES	CORE ENRICHMENT
row_0	100158730	785	1.71057	0.0329296	Yes
row_1	100164587	1526	1.32572	0.0489745	Yes
row_2	100169613	1690	1.26024	0.103139	Yes
row_3	100574604	1746	1.23767	0.1639	Yes
row_4	100163196	1810	1.21387	0.22284	Yes
row_5	100160139	2369	1.02315	0.236167	Yes
row_6	100158883	2567	0.9674	0.27257	Yes
row_7	100165684	2612	0.956218	0.319405	Yes
row_8	100165255	2674	0.938008	0.364063	Yes
row_9	100163139	2706	0.931651	0.410549	Yes
row_10	100163703	2741	0.923347	0.456385	Yes
row_11	100164132	3148	0.824042	0.470244	Yes
row_12	100160792	3303	0.787371	0.50033	Yes
row_13	100164899	3304	0.787288	0.541499	Yes
row_14	100165282	3690	0.687393	0.549724	Yes
row_15	100160599	4678	0.484032	0.503972	No
row_16	100160523	5164	0.387642	0.489323	No
row_17	100166999	5400	0.343438	0.490362	No
row_18	100144899	5605	0.302315	0.491483	No
row_19	100162066	5833	0.252951	0.488366	No
row_20	100160265	7166	0.0022358	0.39258	No
row_21	100163597	11127	-0.70406	0.144279	No
row_22	100165747	12754	-1.07273	0.0833034	No
2ndvRest
NAME	PROBE	RANK IN GENE LIST	RANK METRIC SCORE	RUNNING ES	CORE ENRICHMENT
row_0	100162066	580	0.735418	0.0369374	Yes
row_1	100160139	946	0.63423	0.0785265	Yes
row_2	100574604	989	0.622386	0.142104	Yes
row_3	100164587	1305	0.559036	0.179247	Yes
row_4	100158883	1461	0.53308	0.225132	Yes
row_5	100165255	1545	0.520974	0.274905	Yes
row_6	100164132	1683	0.49801	0.318333	Yes
row_7	100165684	1804	0.481619	0.361231	Yes
row_8	100160599	1985	0.455184	0.396981	Yes
row_9	100163196	2138	0.43383	0.432461	Yes
row_10	100160523	2253	0.41874	0.469062	Yes
row_11	100144899	2708	0.359037	0.474795	Yes
row_12	100165282	2811	0.347057	0.50459	Yes
row_13	100163139	2837	0.342945	0.539488	Yes
row_14	100158730	2991	0.325592	0.563314	Yes
row_15	100160792	3538	0.264502	0.552307	Yes
row_16	100163703	3674	0.250963	0.569442	Yes
row_17	100164899	3888	0.228936	0.578605	Yes
row_18	100169613	5655	0.0755001	0.459533	No
row_19	100166999	6616	-0.0114379	0.391637	No
row_20	100160265	9414	-0.251075	0.217123	No
row_21	100165747	10366	-0.342412	0.185293	No
row_22	100163597	12730	-0.65296	0.0850312	No
3rdvRest
NS
4thvRest
NAME	PROBE	RANK IN GENE LIST	RANK METRIC SCORE	RUNNING ES	CORE ENRICHMENT
row_0	100165747	3172	0.513183	-0.197943	No
row_1	100163597	4709	0.237864	-0.294426	No
row_2	100144899	6797	-0.128866	-0.437045	No
row_3	100166999	7055	-0.174756	-0.445183	No
row_4	100163139	7930	-0.321727	-0.489028	No
row_5	100165255	8222	-0.373454	-0.487829	No
row_6	100160265	8567	-0.426862	-0.487278	No
row_7	100160523	8644	-0.43876	-0.466725	No
row_8	100160599	8776	-0.463024	-0.448693	No
row_9	100164899	10355	-0.709814	-0.520207	Yes
row_10	100158883	10417	-0.716539	-0.482098	Yes
row_11	100160792	10707	-0.755876	-0.458072	Yes
row_12	100163703	11370	-0.838333	-0.456011	Yes
row_13	100165282	11573	-0.876042	-0.418593	Yes
row_14	100163196	11840	-0.917651	-0.383315	Yes
row_15	100158730	11960	-0.943623	-0.335913	Yes
row_16	100165684	12075	-0.966963	-0.286767	Yes
row_17	100164132	12237	-0.999463	-0.239077	Yes
row_18	100169613	12254	-1.00471	-0.180636	Yes
row_19	100162066	12387	-1.03469	-0.128768	Yes
row_20	100164587	12903	-1.17852	-0.0959453	Yes
row_21	100574604	13429	-1.41888	-0.0495856	Yes
row_22	100160139	13432	-1.41986	0.0344878	Yes
YAvRest
NAME	PROBE	RANK IN GENE LIST	RANK METRIC SCORE	RUNNING ES	CORE ENRICHMENT
row_0	100163597	913	0.743728	-0.0211242	No
row_1	100160265	1744	0.490206	-0.0514796	No
row_2	100165747	6386	-0.0628027	-0.381862	No
row_3	100164899	9081	-0.317582	-0.556779	No
row_4	100165282	9257	-0.335224	-0.549271	No
row_5	100164132	10371	-0.454717	-0.602131	Yes
row_6	100158730	10675	-0.489486	-0.594586	Yes
row_7	100160792	10851	-0.508277	-0.576697	Yes
row_8	100160139	10884	-0.512998	-0.54823	Yes
row_9	100162066	11047	-0.532494	-0.527953	Yes
row_10	100166999	11135	-0.541833	-0.501716	Yes
row_11	100574604	11149	-0.543676	-0.470041	Yes
row_12	100169613	11342	-0.566052	-0.449911	Yes
row_13	100165684	12764	-0.776792	-0.505628	Yes
row_14	100163196	13214	-0.889948	-0.484573	Yes
row_15	100160523	13254	-0.900424	-0.433371	Yes
row_16	100160599	13412	-0.955006	-0.387391	Yes
row_17	100144899	13458	-0.973714	-0.332224	Yes
row_18	100163139	13642	-1.07535	-0.280897	Yes
row_19	100164587	13733	-1.15735	-0.217956	Yes
row_20	100163703	13751	-1.17843	-0.148494	Yes
row_21	100165255	13808	-1.25339	-0.0773431	Yes
row_22	100158883	13866	-1.41185	0.00324013	Yes

## Sheet: API00260
API00260	Glycine, serine and threonine metabolism
1stvRest
NAME	PROBE	RANK IN GENE LIST	RANK METRIC SCORE	RUNNING ES	CORE ENRICHMENT
row_0	100160724	443	2.00004	0.047164	Yes
row_1	100161178	529	1.89978	0.11615	Yes
row_2	100165680	1090	1.52398	0.136066	Yes
row_3	100165631	1406	1.37461	0.167723	Yes
row_4	100164013	1716	1.24964	0.194872	Yes
row_5	100163196	1810	1.21387	0.236164	Yes
row_6	100161583	1927	1.16382	0.27382	Yes
row_7	100167150	2064	1.12226	0.308393	Yes
row_8	100159560	2127	1.09929	0.347388	Yes
row_9	100158884	2176	1.08705	0.386907	Yes
row_10	100162566	2517	0.981295	0.401214	Yes
row_11	100163589	2767	0.915648	0.41948	Yes
row_12	100165735	2802	0.905803	0.452841	Yes
row_13	100167268	2812	0.903408	0.487909	Yes
row_14	100159019	3199	0.813651	0.492275	Yes
row_15	100159197	3318	0.783036	0.514733	Yes
row_16	100145826	3494	0.736686	0.531254	Yes
row_17	100162429	3576	0.717145	0.553772	Yes
row_18	100160682	3854	0.647317	0.559413	Yes
row_19	100169052	3969	0.620651	0.575739	Yes
row_20	100162303	4506	0.517538	0.557594	No
row_21	100165866	4821	0.457921	0.553082	No
row_22	100159628	5438	0.336635	0.522023	No
row_23	103311731	6837	0.0635108	0.423843	No
row_24	100165955	8742	-0.280244	0.297786	No
row_25	100160394	9200	-0.360399	0.279119	No
row_26	100159142	10436	-0.570847	0.212736	No
row_27	100166111	12275	-0.94803	0.117833	No
2ndvRest
NAME	PROBE	RANK IN GENE LIST	RANK METRIC SCORE	RUNNING ES	CORE ENRICHMENT
row_0	100160682	142	1.00439	0.0690802	Yes
row_1	100159197	324	0.84049	0.122409	Yes
row_2	100169052	463	0.773772	0.173568	Yes
row_3	100159560	506	0.758824	0.23046	Yes
row_4	100167268	557	0.741119	0.285378	Yes
row_5	100163589	587	0.732518	0.34113	Yes
row_6	100159019	617	0.721834	0.396038	Yes
row_7	100161583	677	0.702783	0.447281	Yes
row_8	100145826	730	0.686073	0.497708	Yes
row_9	103311731	841	0.655555	0.541549	Yes
row_10	100164013	947	0.633968	0.584045	Yes
row_11	100158884	1064	0.605136	0.623472	Yes
row_12	100165735	1075	0.602021	0.670288	Yes
row_13	100162566	1431	0.537127	0.687131	Yes
row_14	100163196	2138	0.43383	0.670537	Yes
row_15	100162429	2352	0.40399	0.687095	Yes
row_16	100167150	2513	0.382139	0.705745	Yes
row_17	100159628	3091	0.31279	0.688884	No
row_18	100165866	4744	0.152835	0.581966	No
row_19	100161178	4784	0.149407	0.590955	No
row_20	100160724	5833	0.0583544	0.52008	No
row_21	100165955	5972	0.0468193	0.513837	No
row_22	100165680	6261	0.0202813	0.494695	No
row_23	100166111	6728	-0.0209379	0.462785	No
row_24	100162303	7329	-0.0694056	0.42505	No
row_25	100159142	8356	-0.154295	0.363335	No
row_26	100160394	8713	-0.187032	0.352462	No
row_27	100165631	9655	-0.276762	0.30654	No
3rdvRest
NS
4thvRest
NAME	PROBE	RANK IN GENE LIST	RANK METRIC SCORE	RUNNING ES	CORE ENRICHMENT
row_0	100160394	2646	0.606348	-0.160835	No
row_1	100159628	4985	0.185634	-0.320125	No
row_2	100162303	5385	0.117713	-0.343088	No
row_3	100159142	5741	0.0555676	-0.365932	No
row_4	100166111	5742	0.0553872	-0.363215	No
row_5	103311731	6301	-0.0475492	-0.401072	No
row_6	100162429	6938	-0.155251	-0.439265	No
row_7	100169052	7043	-0.17347	-0.438246	No
row_8	100145826	7457	-0.248837	-0.455786	No
row_9	100165631	7508	-0.258169	-0.446723	No
row_10	100165735	8826	-0.470375	-0.518507	No
row_11	100165955	9397	-0.559872	-0.532097	No
row_12	100159019	10054	-0.665657	-0.546693	No
row_13	100167268	11291	-0.827747	-0.595112	Yes
row_14	100161178	11620	-0.883367	-0.575403	Yes
row_15	100158884	11829	-0.916243	-0.545439	Yes
row_16	100163196	11840	-0.917651	-0.501145	Yes
row_17	100164013	11904	-0.931978	-0.459966	Yes
row_18	100160724	12119	-0.9748	-0.427561	Yes
row_19	100159197	12250	-1.00371	-0.387688	Yes
row_20	100162566	12639	-1.10155	-0.361599	Yes
row_21	100159560	12756	-1.13374	-0.314339	Yes
row_22	100167150	12897	-1.1767	-0.266701	Yes
row_23	100165866	12926	-1.18617	-0.210531	Yes
row_24	100165680	13090	-1.244	-0.161248	Yes
row_25	100163589	13148	-1.26873	-0.103117	Yes
row_26	100161583	13477	-1.44957	-0.0556345	Yes
row_27	100160682	13775	-1.76992	0.00979544	Yes
YAvRest
NAME	PROBE	RANK IN GENE LIST	RANK METRIC SCORE	RUNNING ES	CORE ENRICHMENT
row_0	100165866	1969	0.445964	-0.120643	No
row_1	100165955	2151	0.412531	-0.114092	No
row_2	100166111	6796	-0.102534	-0.443709	No
row_3	100160394	7239	-0.144275	-0.468694	No
row_4	100165680	8873	-0.29721	-0.5722	No
row_5	100160724	9654	-0.377184	-0.61047	No
row_6	100162303	11103	-0.538638	-0.689188	Yes
row_7	100160682	11158	-0.5451	-0.667195	Yes
row_8	100159019	11872	-0.636881	-0.688309	Yes
row_9	100167268	12257	-0.689793	-0.683214	Yes
row_10	100161178	12405	-0.713728	-0.659914	Yes
row_11	100145826	12612	-0.747575	-0.639255	Yes
row_12	100159142	12722	-0.768919	-0.610596	Yes
row_13	100167150	12895	-0.803921	-0.584813	Yes
row_14	100161583	13057	-0.844492	-0.556312	Yes
row_15	100159628	13093	-0.852524	-0.518354	Yes
row_16	100162566	13127	-0.862557	-0.479775	Yes
row_17	100163589	13146	-0.866816	-0.439914	Yes
row_18	100159197	13173	-0.875468	-0.400218	Yes
row_19	100163196	13214	-0.889948	-0.360843	Yes
row_20	100169052	13286	-0.910379	-0.322731	Yes
row_21	100159560	13604	-1.05112	-0.295655	Yes
row_22	100162429	13611	-1.05489	-0.245999	Yes
row_23	100165631	13635	-1.06853	-0.196921	Yes
row_24	100164013	13636	-1.06861	-0.146181	Yes
row_25	100158884	13675	-1.09733	-0.0968155	Yes
row_26	103311731	13729	-1.14887	-0.046083	Yes
row_27	100165735	13797	-1.24511	0.00821083	Yes

## Sheet: API00270
API00270	Cysteine and methionine metabolism
1stvRest
NAME	PROBE	RANK IN GENE LIST	RANK METRIC SCORE	RUNNING ES	CORE ENRICHMENT
row_0	100168557	1229	1.4591	-0.0399293	Yes
row_1	100165631	1406	1.37461	-0.00676824	Yes
row_2	100167644	1703	1.2551	0.0137563	Yes
row_3	100166082	1769	1.22905	0.050064	Yes
row_4	100163196	1810	1.21387	0.0876675	Yes
row_5	100163756	2049	1.1277	0.108124	Yes
row_6	100159560	2127	1.09929	0.139238	Yes
row_7	100144779	2334	1.03512	0.158913	Yes
row_8	115032974	2358	1.02756	0.191528	Yes
row_9	100164058	2395	1.01581	0.222814	Yes
row_10	100168938	2400	1.01417	0.256352	Yes
row_11	100160633	2542	0.973736	0.278665	Yes
row_12	100164999	2608	0.957499	0.305916	Yes
row_13	100165255	2674	0.938008	0.332516	Yes
row_14	100163139	2706	0.931651	0.361356	Yes
row_15	100165102	2722	0.927555	0.391212	Yes
row_16	100163589	2767	0.915648	0.41858	Yes
row_17	100165735	2802	0.905803	0.446341	Yes
row_18	100163548	2923	0.878393	0.466988	Yes
row_19	100159197	3318	0.783036	0.464703	Yes
row_20	100164839	3678	0.690079	0.46184	Yes
row_21	100161243	3781	0.663772	0.476627	Yes
row_22	100145825	3838	0.652308	0.494347	Yes
row_23	100167587	4035	0.609828	0.500558	Yes
row_24	100166473	4691	0.481878	0.469413	No
row_25	100568466	4732	0.473162	0.482311	No
row_26	100159884	5462	0.331238	0.440807	No
row_27	100144899	5605	0.302315	0.440654	No
row_28	100163591	6092	0.206598	0.41251	No
row_29	100160464	6157	0.192887	0.41433	No
row_30	100169241	6914	0.0499696	0.361498	No
row_31	100163457	7145	0.00612007	0.345122	No
row_32	100160021	7352	-0.0327872	0.331366	No
row_33	100168437	8247	-0.200885	0.27362	No
row_34	100572675	8737	-0.279657	0.247696	No
row_35	100163164	9017	-0.321106	0.238294	No
row_36	100162779	11056	-0.688741	0.114352	No
row_37	100159972	11874	-0.854447	0.0839549	No
row_38	103308886	12222	-0.933126	0.0900638	No
row_39	100166111	12275	-0.94803	0.117936	No
2ndvRest
NAME	PROBE	RANK IN GENE LIST	RANK METRIC SCORE	RUNNING ES	CORE ENRICHMENT
row_0	100159197	324	0.84049	0.0238052	Yes
row_1	100161243	352	0.823142	0.068047	Yes
row_2	100163548	376	0.809282	0.111799	Yes
row_3	100568466	399	0.798556	0.155022	Yes
row_4	100159560	506	0.758824	0.18996	Yes
row_5	100163589	587	0.732518	0.225296	Yes
row_6	100166082	689	0.701333	0.257368	Yes
row_7	100166473	695	0.698307	0.296191	Yes
row_8	100572675	887	0.647278	0.318743	Yes
row_9	100167587	919	0.641243	0.35249	Yes
row_10	100159884	976	0.627485	0.383662	Yes
row_11	100165735	1075	0.602021	0.410378	Yes
row_12	100145825	1174	0.583723	0.436067	Yes
row_13	115032974	1177	0.583289	0.468653	Yes
row_14	100160633	1254	0.568841	0.495093	Yes
row_15	100165255	1545	0.520974	0.503421	Yes
row_16	100164058	1567	0.516219	0.530873	Yes
row_17	100160464	1817	0.479795	0.539845	Yes
row_18	100167644	1969	0.457493	0.554631	Yes
row_19	100169241	2092	0.44204	0.57064	Yes
row_20	100163196	2138	0.43383	0.591739	Yes
row_21	100165102	2587	0.373312	0.580391	Yes
row_22	100144899	2708	0.359037	0.591887	Yes
row_23	100163139	2837	0.342945	0.601903	Yes
row_24	100164839	3441	0.27445	0.573834	No
row_25	100168557	3586	0.259764	0.578029	No
row_26	100144779	3626	0.255908	0.589577	No
row_27	103308886	4072	0.212622	0.569429	No
row_28	100163457	4968	0.13247	0.512344	No
row_29	100162779	5292	0.105862	0.495	No
row_30	100168938	5432	0.0941904	0.490265	No
row_31	100168437	5669	0.0735073	0.477377	No
row_32	100163756	5920	0.051323	0.462235	No
row_33	100164999	5982	0.0459122	0.460413	No
row_34	100166111	6728	-0.0209379	0.407883	No
row_35	100159972	8874	-0.20033	0.264496	No
row_36	100165631	9655	-0.276762	0.223797	No
row_37	100163164	11139	-0.422932	0.140623	No
row_38	100163591	11477	-0.463246	0.142323	No
row_39	100160021	12395	-0.58929	0.109285	No
3rdvRest
NS
4thvRest
NAME	PROBE	RANK IN GENE LIST	RANK METRIC SCORE	RUNNING ES	CORE ENRICHMENT
row_0	100160021	2557	0.623743	-0.159463	No
row_1	100159972	2993	0.542648	-0.169188	No
row_2	100163164	3598	0.429654	-0.195601	No
row_3	100163591	4073	0.351218	-0.215769	No
row_4	100169241	4155	0.33491	-0.208257	No
row_5	103308886	4456	0.278976	-0.218762	No
row_6	100168437	5048	0.176499	-0.254329	No
row_7	100162779	5736	0.0565404	-0.3016	No
row_8	100166111	5742	0.0553872	-0.299752	No
row_9	100572675	6511	-0.0824591	-0.351828	No
row_10	100144899	6797	-0.128866	-0.367236	No
row_11	100160464	6996	-0.165214	-0.374923	No
row_12	100165631	7508	-0.258169	-0.401468	No
row_13	100568466	7545	-0.265356	-0.393484	No
row_14	100163139	7930	-0.321727	-0.40834	No
row_15	100165255	8222	-0.373454	-0.41443	Yes
row_16	100159884	8360	-0.393217	-0.408631	Yes
row_17	100167644	8380	-0.397218	-0.394165	Yes
row_18	100168557	8439	-0.407312	-0.382109	Yes
row_19	100161243	8640	-0.438279	-0.379054	Yes
row_20	100165735	8826	-0.470375	-0.373639	Yes
row_21	100164999	9441	-0.566295	-0.395325	Yes
row_22	100163457	9518	-0.577838	-0.377768	Yes
row_23	100163548	9793	-0.625089	-0.372601	Yes
row_24	100163756	9795	-0.625178	-0.34775	Yes
row_25	100145825	10061	-0.667006	-0.340263	Yes
row_26	100168938	10372	-0.711595	-0.334243	Yes
row_27	100144779	10824	-0.770352	-0.336044	Yes
row_28	100165102	11076	-0.801925	-0.322169	Yes
row_29	100164839	11449	-0.853747	-0.314951	Yes
row_30	115032974	11777	-0.907036	-0.302365	Yes
row_31	100163196	11840	-0.917651	-0.270252	Yes
row_32	100159197	12250	-1.00371	-0.259723	Yes
row_33	100167587	12261	-1.00608	-0.220336	Yes
row_34	100159560	12756	-1.13374	-0.210751	Yes
row_35	100163589	13148	-1.26873	-0.188359	Yes
row_36	100166082	13173	-1.28298	-0.138943	Yes
row_37	100166473	13490	-1.45525	-0.103709	Yes
row_38	100164058	13496	-1.46067	-0.0458398	Yes
row_39	100160633	13819	-1.8985	0.006632	Yes
YAvRest
NAME	PROBE	RANK IN GENE LIST	RANK METRIC SCORE	RUNNING ES	CORE ENRICHMENT
row_0	100163164	1143	0.648141	-0.0594181	No
row_1	100163457	1215	0.625788	-0.0423507	No
row_2	100159972	1854	0.466396	-0.0718078	No
row_3	100160021	2448	0.365511	-0.101598	No
row_4	100164839	3905	0.182228	-0.200097	No
row_5	100166473	5127	0.0592008	-0.286017	No
row_6	100163591	5726	0.000947675	-0.329092	No
row_7	100167587	6524	-0.0764317	-0.383836	No
row_8	100166111	6796	-0.102534	-0.399737	No
row_9	100169241	7228	-0.142877	-0.425741	No
row_10	100162779	9194	-0.330004	-0.555694	No
row_11	100168938	9488	-0.360197	-0.564046	No
row_12	100164058	10215	-0.439171	-0.600812	No
row_13	100164999	10222	-0.439627	-0.585659	No
row_14	100160633	10324	-0.449167	-0.577016	No
row_15	100160464	10615	-0.482196	-0.580826	No
row_16	100165102	11327	-0.564908	-0.612053	No
row_17	100145825	11396	-0.571949	-0.596678	No
row_18	100168437	12096	-0.668296	-0.623375	Yes
row_19	100144779	12108	-0.66993	-0.600417	Yes
row_20	100163756	12194	-0.682593	-0.582345	Yes
row_21	115032974	12719	-0.768491	-0.592874	Yes
row_22	100163589	13146	-0.866816	-0.592853	Yes
row_23	100159197	13173	-0.875468	-0.56369	Yes
row_24	100163196	13214	-0.889948	-0.535023	Yes
row_25	100166082	13242	-0.897042	-0.505167	Yes
row_26	103308886	13333	-0.929033	-0.478719	Yes
row_27	100167644	13416	-0.958026	-0.450665	Yes
row_28	100144899	13458	-0.973714	-0.419101	Yes
row_29	100568466	13542	-1.01642	-0.389049	Yes
row_30	100159560	13604	-1.05112	-0.356182	Yes
row_31	100165631	13635	-1.06853	-0.320463	Yes
row_32	100163139	13642	-1.07535	-0.282772	Yes
row_33	100159884	13651	-1.08019	-0.245053	Yes
row_34	100168557	13683	-1.1049	-0.208117	Yes
row_35	100161243	13727	-1.14797	-0.170519	Yes
row_36	100163548	13759	-1.18995	-0.130567	Yes
row_37	100165735	13797	-1.24511	-0.0890922	Yes
row_38	100165255	13808	-1.25339	-0.0453774	Yes
row_39	100572675	13880	-1.48737	0.00223496	Yes

## Sheet: API00280
API00280	Valine, leucine and isoleucine degradation
1stvRest
NAME	PROBE	RANK IN GENE LIST	RANK METRIC SCORE	RUNNING ES	CORE ENRICHMENT
row_0	100161259	298	2.1839	0.0476733	Yes
row_1	100169095	811	1.68686	0.0641835	Yes
row_2	100164587	1526	1.32572	0.0546986	Yes
row_3	100165582	1555	1.31178	0.0942174	Yes
row_4	100165054	1611	1.28999	0.1311	Yes
row_5	100163196	1810	1.21387	0.155265	Yes
row_6	100165942	1850	1.19387	0.190258	Yes
row_7	100168589	2026	1.13306	0.213522	Yes
row_8	100162815	2073	1.11728	0.245585	Yes
row_9	100164806	2106	1.10372	0.278227	Yes
row_10	100159954	2207	1.07777	0.305147	Yes
row_11	107882140	2214	1.07559	0.338772	Yes
row_12	100165320	2251	1.06013	0.369746	Yes
row_13	100161123	2510	0.98307	0.382279	Yes
row_14	100159806	2738	0.923932	0.395173	Yes
row_15	100168762	3143	0.824998	0.392177	Yes
row_16	100159019	3199	0.813651	0.413977	Yes
row_17	100169093	3285	0.789666	0.432855	Yes
row_18	100162429	3576	0.717145	0.43466	Yes
row_19	100165657	3629	0.702431	0.453155	Yes
row_20	100167580	3877	0.641065	0.455651	Yes
row_21	100169569	4029	0.611777	0.464139	Yes
row_22	100167587	4035	0.609828	0.483088	Yes
row_23	100168720	4088	0.597912	0.498273	Yes
row_24	100168209	4212	0.576217	0.507653	Yes
row_25	100162800	4287	0.560103	0.520055	Yes
row_26	100162752	4417	0.533502	0.52765	Yes
row_27	100165961	4482	0.522576	0.539584	Yes
row_28	100159764	4504	0.517887	0.554469	Yes
row_29	100160586	4668	0.485698	0.5581	Yes
row_30	100167287	5513	0.320848	0.507426	No
row_31	100168625	5597	0.303744	0.511062	No
row_32	100167180	6806	0.069746	0.426201	No
row_33	100166852	9027	-0.324161	0.276454	No
row_34	100168685	9622	-0.425266	0.247106	No
row_35	100164493	9899	-0.474101	0.242225	No
row_36	100572734	10970	-0.671435	0.186363	No
row_37	100164885	11640	-0.806715	0.163687	No
2ndvRest
NAME	PROBE	RANK IN GENE LIST	RANK METRIC SCORE	RUNNING ES	CORE ENRICHMENT
row_0	100165320	357	0.819176	0.0209337	Yes
row_1	100169093	380	0.808288	0.0653931	Yes
row_2	100164806	464	0.773585	0.103479	Yes
row_3	100159019	617	0.721834	0.133643	Yes
row_4	100165961	766	0.677264	0.161557	Yes
row_5	100165054	825	0.661369	0.195052	Yes
row_6	100168720	853	0.653769	0.230349	Yes
row_7	100167587	919	0.641243	0.262193	Yes
row_8	100168589	1049	0.608134	0.287538	Yes
row_9	100159954	1248	0.569717	0.305721	Yes
row_10	100165582	1274	0.565107	0.336111	Yes
row_11	100164587	1305	0.559036	0.365795	Yes
row_12	100168762	1414	0.540262	0.388788	Yes
row_13	100162752	1444	0.535004	0.417175	Yes
row_14	100159806	1509	0.525916	0.442521	Yes
row_15	100166852	1549	0.519874	0.469325	Yes
row_16	100161123	1772	0.485371	0.480974	Yes
row_17	100162800	1801	0.481933	0.506409	Yes
row_18	107882140	1978	0.456143	0.519709	Yes
row_19	100165942	2069	0.445197	0.538583	Yes
row_20	100163196	2138	0.43383	0.558395	Yes
row_21	100165657	2205	0.426631	0.577942	Yes
row_22	100162429	2352	0.40399	0.590432	Yes
row_23	100167580	2502	0.384068	0.601572	Yes
row_24	100169095	2593	0.372433	0.616301	Yes
row_25	100168209	2604	0.371092	0.63672	Yes
row_26	100160586	2813	0.346749	0.641481	Yes
row_27	100167287	2930	0.333129	0.652097	Yes
row_28	100168625	3064	0.315959	0.660509	Yes
row_29	100572734	3628	0.255753	0.634499	No
row_30	100164885	3685	0.249521	0.644677	No
row_31	100169569	3941	0.224344	0.639077	No
row_32	100162815	3981	0.22138	0.648878	No
row_33	100161259	4923	0.136759	0.588844	No
row_34	100164493	5994	0.0447962	0.514273	No
row_35	100159764	6144	0.0325023	0.505385	No
row_36	100167180	9540	-0.264541	0.275752	No
row_37	100168685	12866	-0.688573	0.0753209	No
3rdvRest
NAME	PROBE	RANK IN GENE LIST	RANK METRIC SCORE	RUNNING ES	CORE ENRICHMENT
row_0	100166852	2892	0.318134	-0.184865	No
row_1	100164493	3015	0.301121	-0.171338	No
row_2	100168685	3808	0.195334	-0.213943	No
row_3	100164885	4393	0.130776	-0.246342	No
row_4	100162800	4664	0.0997695	-0.258408	No
row_5	100572734	5059	0.0581606	-0.282495	No
row_6	100168625	5272	0.0343128	-0.295232	No
row_7	100169093	5887	-0.0281407	-0.337401	No
row_8	100164587	6335	-0.0701348	-0.364421	No
row_9	100162429	6939	-0.125429	-0.398586	No
row_10	100167580	7341	-0.163538	-0.415366	No
row_11	100159806	7473	-0.17597	-0.411764	No
row_12	100165657	7593	-0.18931	-0.406308	No
row_13	100163196	7653	-0.195695	-0.396055	No
row_14	100168209	8047	-0.233485	-0.407074	No
row_15	100160586	8410	-0.270491	-0.413115	No
row_16	100165582	9077	-0.333739	-0.436379	Yes
row_17	100165054	9201	-0.345124	-0.419662	Yes
row_18	100161259	9391	-0.363051	-0.406373	Yes
row_19	100159019	9492	-0.373874	-0.385866	Yes
row_20	100159954	9833	-0.409243	-0.380037	Yes
row_21	100165942	9873	-0.412735	-0.352253	Yes
row_22	100168589	9914	-0.416358	-0.324273	Yes
row_23	100165961	10290	-0.454995	-0.317575	Yes
row_24	100167180	10511	-0.479781	-0.297867	Yes
row_25	100167287	10520	-0.481028	-0.262787	Yes
row_26	100167587	10528	-0.482054	-0.227558	Yes
row_27	100165320	10553	-0.485938	-0.193267	Yes
row_28	100168720	10627	-0.494528	-0.161871	Yes
row_29	100164806	10714	-0.503051	-0.13078	Yes
row_30	100159764	10923	-0.526553	-0.10674	Yes
row_31	100162815	10928	-0.527352	-0.0679376	Yes
row_32	100169569	10930	-0.527446	-0.0289118	Yes
row_33	100169095	11120	-0.547326	-0.0019629	Yes
row_34	100162752	11363	-0.577849	0.0234285	Yes
row_35	107882140	12218	-0.680742	0.0123357	Yes
row_36	100161123	12418	-0.710842	0.0506848	Yes
row_37	100168762	12719	-0.766988	0.085916	Yes
4thvRest
NAME	PROBE	RANK IN GENE LIST	RANK METRIC SCORE	RUNNING ES	CORE ENRICHMENT
row_0	100164885	1276	0.882849	-0.0578304	No
row_1	100572734	1492	0.835139	-0.0410318	No
row_2	100164493	3663	0.416956	-0.181316	No
row_3	100168685	4103	0.347169	-0.199532	No
row_4	100166852	5071	0.172476	-0.262561	No
row_5	100168625	6555	-0.0906738	-0.365945	No
row_6	100165961	6645	-0.103274	-0.368367	No
row_7	100167287	6691	-0.111062	-0.367315	No
row_8	100168209	6715	-0.114623	-0.364541	No
row_9	100162429	6938	-0.155251	-0.374538	No
row_10	100162800	7226	-0.20528	-0.387286	No
row_11	100161123	7742	-0.290748	-0.413162	No
row_12	100169569	7782	-0.295408	-0.40455	No
row_13	100162752	8167	-0.364021	-0.418151	No
row_14	100167180	8386	-0.397746	-0.418482	No
row_15	100162815	8925	-0.48337	-0.438568	No
row_16	100159806	9667	-0.605961	-0.468544	Yes
row_17	100159954	9796	-0.625596	-0.453578	Yes
row_18	100159019	10054	-0.665657	-0.446361	Yes
row_19	100161259	10264	-0.697147	-0.434466	Yes
row_20	100168720	10280	-0.698911	-0.40852	Yes
row_21	100159764	10402	-0.714494	-0.389611	Yes
row_22	100165942	10661	-0.750293	-0.379193	Yes
row_23	100169093	11127	-0.8088	-0.381432	Yes
row_24	100164806	11361	-0.83755	-0.365838	Yes
row_25	100168762	11800	-0.910393	-0.362202	Yes
row_26	107882140	11835	-0.916946	-0.329194	Yes
row_27	100163196	11840	-0.917651	-0.293996	Yes
row_28	100165657	12005	-0.954736	-0.268897	Yes
row_29	100165320	12035	-0.960049	-0.233862	Yes
row_30	100168589	12167	-0.982364	-0.205315	Yes
row_31	100167587	12261	-1.00608	-0.173113	Yes
row_32	100164587	12903	-1.17852	-0.173741	Yes
row_33	100165582	12941	-1.19232	-0.1303	Yes
row_34	100160586	12957	-1.19699	-0.0850928	Yes
row_35	100169095	13178	-1.28593	-0.0512221	Yes
row_36	100165054	13274	-1.33814	-0.00632287	Yes
row_37	100167580	13299	-1.34894	0.0441114	Yes
YAvRest
NAME	PROBE	RANK IN GENE LIST	RANK METRIC SCORE	RUNNING ES	CORE ENRICHMENT
row_0	100167180	916	0.74217	-0.0341927	No
row_1	100168685	1930	0.452385	-0.0878051	No
row_2	100159764	2483	0.360031	-0.112151	No
row_3	100160586	4180	0.152166	-0.227868	No
row_4	100167580	5585	0.0169462	-0.328338	No
row_5	100168762	5925	-0.0190921	-0.351953	No
row_6	100167587	6524	-0.0764317	-0.391777	No
row_7	100169569	6893	-0.110912	-0.413545	No
row_8	100167287	6975	-0.117966	-0.414324	No
row_9	107882140	7407	-0.15957	-0.438545	No
row_10	100168720	7617	-0.179905	-0.445894	No
row_11	100165657	7675	-0.186731	-0.441994	No
row_12	100162752	7948	-0.213459	-0.452444	No
row_13	100169095	9464	-0.358328	-0.546273	No
row_14	100164493	9510	-0.362932	-0.533951	No
row_15	100162815	10525	-0.473546	-0.586728	No
row_16	100168625	11849	-0.633104	-0.654934	Yes
row_17	100159019	11872	-0.636881	-0.629205	Yes
row_18	100168589	11877	-0.637505	-0.602152	Yes
row_19	100165942	11910	-0.642645	-0.576897	Yes
row_20	100161123	12101	-0.668742	-0.561911	Yes
row_21	100168209	12471	-0.724819	-0.557421	Yes
row_22	100165582	12509	-0.729918	-0.528783	Yes
row_23	100165054	12691	-0.761832	-0.509156	Yes
row_24	100165320	12953	-0.817973	-0.492887	Yes
row_25	100166852	12971	-0.823463	-0.458796	Yes
row_26	100159954	13145	-0.866807	-0.43409	Yes
row_27	100164806	13189	-0.882402	-0.399345	Yes
row_28	100163196	13214	-0.889948	-0.362907	Yes
row_29	100164885	13303	-0.913276	-0.330081	Yes
row_30	100572734	13411	-0.954755	-0.296846	Yes
row_31	100165961	13432	-0.965593	-0.256875	Yes
row_32	100159806	13461	-0.974499	-0.217099	Yes
row_33	100161259	13476	-0.984599	-0.175881	Yes
row_34	100162429	13611	-1.05489	-0.140297	Yes
row_35	100164587	13733	-1.15735	-0.0993827	Yes
row_36	100162800	13819	-1.28324	-0.0504737	Yes
row_37	100169093	13839	-1.32981	0.00518943	Yes

## Sheet: API00310
API00310	Lysine degradation
1stvRest
NS
2ndvRest
NAME	PROBE	RANK IN GENE LIST	RANK METRIC SCORE	RUNNING ES	CORE ENRICHMENT
row_0	100166221	259	0.880479	0.0233761	Yes
row_1	100169093	380	0.808288	0.053331	Yes
row_2	100163885	394	0.801364	0.0906741	Yes
row_3	100159019	617	0.721834	0.109141	Yes
row_4	100162555	970	0.628731	0.113782	Yes
row_5	100159163	1120	0.59414	0.131415	Yes
row_6	100159954	1248	0.569717	0.149469	Yes
row_7	100569638	1340	0.55254	0.169299	Yes
row_8	100163339	1380	0.545444	0.192541	Yes
row_9	100162752	1444	0.535004	0.213553	Yes
row_10	100167230	1572	0.515785	0.22903	Yes
row_11	103309898	1603	0.510709	0.251262	Yes
row_12	100162331	1632	0.506622	0.273444	Yes
row_13	100162800	1801	0.481933	0.284346	Yes
row_14	100159693	1905	0.465438	0.29915	Yes
row_15	100161573	1924	0.46324	0.31998	Yes
row_16	100165942	2069	0.445197	0.330859	Yes
row_17	100165657	2205	0.426631	0.3415	Yes
row_18	100168280	2263	0.417039	0.35731	Yes
row_19	100568468	2303	0.41101	0.37413	Yes
row_20	100162429	2352	0.40399	0.389966	Yes
row_21	103310795	2414	0.394441	0.404408	Yes
row_22	100168209	2604	0.371092	0.4085	Yes
row_23	100573227	3263	0.294942	0.375122	No
row_24	100572734	3628	0.255753	0.36108	No
row_25	100164885	3685	0.249521	0.36896	No
row_26	100169569	3941	0.224344	0.361281	No
row_27	100160754	3962	0.223332	0.370507	No
row_28	100162815	3981	0.22138	0.379784	No
row_29	100574903	4105	0.209545	0.38092	No
row_30	100162793	4132	0.207468	0.388955	No
row_31	100575304	4238	0.197538	0.390817	No
row_32	103310723	4352	0.187453	0.39162	No
row_33	100161259	4923	0.136759	0.357033	No
row_34	100161603	5043	0.127517	0.35454	No
row_35	100168129	7830	-0.109908	0.158809	No
row_36	100571907	8503	-0.167954	0.118354	No
row_37	100168226	8778	-0.191617	0.107742	No
row_38	100159159	9001	-0.213521	0.101926	No
row_39	100168406	9411	-0.251015	0.0844122	No
row_40	100165352	10089	-0.315413	0.0506409	No
row_41	100165299	10327	-0.338124	0.0496959	No
row_42	100165877	10583	-0.365265	0.0487489	No
row_43	100165222	10835	-0.389889	0.0492667	No
row_44	100161826	11132	-0.421903	0.0480676	No
row_45	100165448	11301	-0.441799	0.0570527	No
row_46	100167890	11581	-0.476674	0.0596964	No
row_47	100169494	12082	-0.538701	0.0493601	No
row_48	100161505	13289	-0.810925	0.00109738	No
row_49	100161910	13490	-0.914832	0.0303707	No
3rdvRest
NS
4thvRest
NS
YAvRest
NAME	PROBE	RANK IN GENE LIST	RANK METRIC SCORE	RUNNING ES	CORE ENRICHMENT
row_0	100161910	1382	0.575961	-0.0766361	No
row_1	100168129	1605	0.520244	-0.071821	No
row_2	100169494	1645	0.509372	-0.0542397	No
row_3	100167890	2146	0.41307	-0.0737706	No
row_4	100575304	2574	0.348972	-0.0906018	No
row_5	100165448	3561	0.219193	-0.152955	No
row_6	100161505	3995	0.171984	-0.177306	No
row_7	103310723	4360	0.134858	-0.198165	No
row_8	100165877	4453	0.12625	-0.199747	No
row_9	100571907	4788	0.0921253	-0.220153	No
row_10	100159159	5243	0.0487216	-0.250953	No
row_11	100161573	5566	0.0184947	-0.273442	No
row_12	100159693	5731	0.000239189	-0.285263	No
row_13	100165352	6481	-0.071573	-0.33643	No
row_14	100169569	6893	-0.110912	-0.361639	No
row_15	100569638	6899	-0.11137	-0.35754	No
row_16	100568468	7287	-0.148254	-0.379522	No
row_17	100161826	7413	-0.15991	-0.382137	No
row_18	100165657	7675	-0.186731	-0.393489	No
row_19	100159163	7804	-0.197713	-0.394807	No
row_20	100165299	7900	-0.207974	-0.393333	No
row_21	100162752	7948	-0.213459	-0.388177	No
row_22	100168280	8475	-0.26337	-0.415577	No
row_23	100168406	9050	-0.313336	-0.44444	No
row_24	100165222	9827	-0.39524	-0.484595	No
row_25	100163339	9832	-0.395617	-0.469044	No
row_26	100162331	9875	-0.401224	-0.456009	No
row_27	100162815	10525	-0.473546	-0.483867	No
row_28	100163885	10567	-0.478033	-0.467685	No
row_29	103310795	11377	-0.569712	-0.503235	Yes
row_30	100162793	11564	-0.596903	-0.492754	Yes
row_31	100159019	11872	-0.636881	-0.4894	Yes
row_32	100162555	11886	-0.638541	-0.464772	Yes
row_33	100165942	11910	-0.642645	-0.4407	Yes
row_34	100160754	11911	-0.642752	-0.414965	Yes
row_35	100168226	11999	-0.654998	-0.395016	Yes
row_36	100166221	12165	-0.678577	-0.379749	Yes
row_37	100168209	12471	-0.724819	-0.372731	Yes
row_38	100574903	12912	-0.808174	-0.372113	Yes
row_39	100159954	13145	-0.866807	-0.354144	Yes
row_40	100573227	13159	-0.870414	-0.320231	Yes
row_41	103309898	13235	-0.895339	-0.289793	Yes
row_42	100164885	13303	-0.913276	-0.25806	Yes
row_43	100161603	13398	-0.950728	-0.226775	Yes
row_44	100572734	13411	-0.954755	-0.189413	Yes
row_45	100167230	13445	-0.970025	-0.152955	Yes
row_46	100161259	13476	-0.984599	-0.115696	Yes
row_47	100162429	13611	-1.05489	-0.0831265	Yes
row_48	100162800	13819	-1.28324	-0.0466796	Yes
row_49	100169093	13839	-1.32981	0.00519399	Yes

## Sheet: API00330
API00330	Arginine and proline metabolism
1stvRest
NAME	PROBE	RANK IN GENE LIST	RANK METRIC SCORE	RUNNING ES	CORE ENRICHMENT
row_0	100158825	54	2.80602	0.079561	Yes
row_1	100165503	102	2.61294	0.153884	Yes
row_2	100161929	184	2.39251	0.219202	Yes
row_3	100160390	261	2.25114	0.280675	Yes
row_4	100572240	376	2.06624	0.333912	Yes
row_5	107882882	539	1.88527	0.378307	Yes
row_6	100166732	946	1.60188	0.396693	Yes
row_7	100166082	1769	1.22905	0.374015	Yes
row_8	100168809	2291	1.04786	0.367637	Yes
row_9	100159277	2306	1.04479	0.397701	Yes
row_10	100144779	2334	1.03512	0.42654	Yes
row_11	100568765	2551	0.970825	0.439849	Yes
row_12	100164999	2608	0.957499	0.46429	Yes
row_13	100165255	2674	0.938008	0.487503	Yes
row_14	100163139	2706	0.931651	0.512977	Yes
row_15	100167299	2828	0.90092	0.531052	Yes
row_16	100159019	3199	0.813651	0.528589	Yes
row_17	100169093	3285	0.789666	0.54595	Yes
row_18	100168209	4212	0.576217	0.496362	No
row_19	100162800	4287	0.560103	0.507688	No
row_20	100166186	4454	0.528006	0.51143	No
row_21	100160914	4558	0.509083	0.519148	No
row_22	100167377	4693	0.481837	0.523822	No
row_23	100159958	4836	0.45418	0.527098	No
row_24	100161005	5270	0.367429	0.506825	No
row_25	100144899	5605	0.302315	0.491749	No
row_26	100163767	6138	0.19802	0.459304	No
row_27	100570569	6442	0.138123	0.441579	No
row_28	100161119	7389	-0.0397235	0.374595	No
row_29	100168437	8247	-0.200885	0.318817	No
row_30	100166238	9723	-0.442447	0.225692	No
row_31	100572734	10970	-0.671435	0.155879	No
row_32	100164885	11640	-0.806715	0.131665	No
row_33	100165747	12754	-1.07273	0.0833694	No
2ndvRest
NAME	PROBE	RANK IN GENE LIST	RANK METRIC SCORE	RUNNING ES	CORE ENRICHMENT
row_0	100161119	305	0.850387	0.0416801	Yes
row_1	100159277	336	0.835392	0.102053	Yes
row_2	100169093	380	0.808288	0.159461	Yes
row_3	100167299	426	0.786128	0.215065	Yes
row_4	100168809	484	0.766614	0.268344	Yes
row_5	100159019	617	0.721834	0.312867	Yes
row_6	100167377	645	0.71178	0.364203	Yes
row_7	100166082	689	0.701333	0.413604	Yes
row_8	100165255	1545	0.520974	0.390995	Yes
row_9	100162800	1801	0.481933	0.408696	Yes
row_10	100160914	1949	0.459654	0.432512	Yes
row_11	100168209	2604	0.371092	0.413166	Yes
row_12	100163767	2641	0.366993	0.438044	Yes
row_13	100144899	2708	0.359037	0.460165	Yes
row_14	100163139	2837	0.342945	0.476613	Yes
row_15	100144779	3626	0.255908	0.438989	No
row_16	100572734	3628	0.255753	0.458062	No
row_17	100164885	3685	0.249521	0.472705	No
row_18	100161005	4109	0.209335	0.457895	No
row_19	100160390	5083	0.124281	0.397088	No
row_20	100572240	5580	0.0823565	0.367513	No
row_21	100166186	5640	0.0772929	0.369047	No
row_22	100168437	5669	0.0735073	0.372532	No
row_23	100164999	5982	0.0459122	0.353487	No
row_24	100158825	6420	0.00658939	0.322492	No
row_25	100165503	6746	-0.0226986	0.300773	No
row_26	100166238	7217	-0.0598378	0.271385	No
row_27	100161929	8111	-0.132768	0.216978	No
row_28	100166732	9599	-0.270743	0.130097	No
row_29	100568765	10214	-0.326374	0.110285	No
row_30	100165747	10366	-0.342412	0.125037	No
row_31	100159958	11558	-0.473242	0.0746427	No
row_32	107882882	12470	-0.602536	0.0541032	No
row_33	100570569	12774	-0.663375	0.0819283	No
3rdvRest
NS
4thvRest
NS
YAvRest
NAME	PROBE	RANK IN GENE LIST	RANK METRIC SCORE	RUNNING ES	CORE ENRICHMENT
row_0	100570569	237	1.26489	0.0387125	No
row_1	100161005	3206	0.262852	-0.163558	No
row_2	100159958	3217	0.261459	-0.152746	No
row_3	100165747	6386	-0.0628027	-0.378251	No
row_4	100166186	6545	-0.07826	-0.386184	No
row_5	100161929	6591	-0.0821252	-0.385805	No
row_6	107882882	6833	-0.10633	-0.39848	No
row_7	100161119	8386	-0.254178	-0.499101	No
row_8	100568765	8394	-0.255183	-0.48835	No
row_9	100165503	9441	-0.356567	-0.547994	No
row_10	100166732	9489	-0.360253	-0.535492	No
row_11	100164999	10222	-0.439627	-0.568846	No
row_12	100163767	10773	-0.500216	-0.586415	Yes
row_13	100166238	10958	-0.52178	-0.576659	Yes
row_14	100160914	11281	-0.558693	-0.575219	Yes
row_15	100159277	11290	-0.55959	-0.551114	Yes
row_16	100160390	11335	-0.565672	-0.529335	Yes
row_17	100158825	11621	-0.602286	-0.523306	Yes
row_18	100159019	11872	-0.636881	-0.51323	Yes
row_19	100168437	12096	-0.668296	-0.499822	Yes
row_20	100144779	12108	-0.66993	-0.471067	Yes
row_21	100168209	12471	-0.724819	-0.465182	Yes
row_22	100167299	12473	-0.72501	-0.433276	Yes
row_23	100572240	13016	-0.833949	-0.435548	Yes
row_24	100166082	13242	-0.897042	-0.412195	Yes
row_25	100164885	13303	-0.913276	-0.376237	Yes
row_26	100572734	13411	-0.954755	-0.341837	Yes
row_27	100144899	13458	-0.973714	-0.302204	Yes
row_28	100163139	13642	-1.07535	-0.267961	Yes
row_29	100167377	13806	-1.25194	-0.224487	Yes
row_30	100165255	13808	-1.25339	-0.169276	Yes
row_31	100162800	13819	-1.28324	-0.113397	Yes
row_32	100169093	13839	-1.32981	-0.0561133	Yes
row_33	100168809	13860	-1.38822	0.003675	Yes

## Sheet: API00340
API00340	Histidine metabolism
1stvRest
NS
2ndvRest
NS
3rdvRest
NS
4thvRest
NS
YAvRest
NAME	PROBE	RANK IN GENE LIST	RANK METRIC SCORE	RUNNING ES	CORE ENRICHMENT
row_0	100159557	1903	0.457917	-0.0702692	No
row_1	100163993	5195	0.052344	-0.299367	No
row_2	100166238	10958	-0.52178	-0.637912	Yes
row_3	100159019	11872	-0.636881	-0.610942	Yes
row_4	100168209	12471	-0.724819	-0.548524	Yes
row_5	100164885	13303	-0.913276	-0.475451	Yes
row_6	100572734	13411	-0.954755	-0.34427	Yes
row_7	100162800	13819	-1.28324	-0.186886	Yes
row_8	100169093	13839	-1.32981	0.00517869	Yes

## Sheet: API00350
API00350	Tyrosine metabolism
1stvRest
NAME	PROBE	RANK IN GENE LIST	RANK METRIC SCORE	RUNNING ES	CORE ENRICHMENT
row_0	100165124	677	1.78019	0.082152	Yes
row_1	103309364	697	1.76992	0.210904	Yes
row_2	100164929	882	1.6405	0.318266	Yes
row_3	100144890	2478	0.992235	0.276423	Yes
row_4	100165255	2674	0.938008	0.331349	Yes
row_5	100163139	2706	0.931651	0.39761	Yes
row_6	100164582	2844	0.897553	0.453736	Yes
row_7	100162394	2930	0.876698	0.512071	Yes
row_8	100166363	3325	0.781909	0.541199	Yes
row_9	100573063	3694	0.687016	0.565222	Yes
row_10	100168964	3736	0.674434	0.611854	Yes
row_11	100160466	5033	0.411845	0.548861	No
row_12	100167369	5153	0.389945	0.568964	No
row_13	100571322	5435	0.337102	0.573524	No
row_14	100144899	5605	0.302315	0.583586	No
row_15	100161225	7638	-0.0818521	0.443364	No
row_16	100164837	7785	-0.109105	0.440878	No
2ndvRest
NS
3rdvRest
NAME	PROBE	RANK IN GENE LIST	RANK METRIC SCORE	RUNNING ES	CORE ENRICHMENT
row_0	100164837	1589	0.54041	-0.0691563	No
row_1	100573063	2220	0.425239	-0.0789282	No
row_2	100160466	2899	0.316435	-0.101255	No
row_3	100144899	3033	0.298741	-0.0858395	No
row_4	100571322	4620	0.105516	-0.191156	No
row_5	100161225	5550	0.00532578	-0.257569	No
row_6	100163139	7558	-0.185675	-0.386479	No
row_7	100165255	7963	-0.225272	-0.396712	No
row_8	100168964	10491	-0.477653	-0.538623	No
row_9	100167369	11061	-0.541015	-0.534322	No
row_10	100166363	12961	-0.818198	-0.602553	Yes
row_11	103309364	13129	-0.865777	-0.542156	Yes
row_12	100165124	13190	-0.889913	-0.472039	Yes
row_13	100164929	13259	-0.915202	-0.400383	Yes
row_14	100164582	13285	-0.926032	-0.324726	Yes
row_15	100144890	13909	-2.00838	-0.201576	Yes
row_16	100162394	13911	-2.41082	2.47092e-08	Yes
4thvRest
NS
YAvRest
NS

[truncated: 8 more sheets: API00360, API00380, API00410, API00480, API00740, API00750, API00770, API00790_x0009_]
